# Supplementary material
Source: publisher site journal article supplement (https://www.dovepress.com/article/207626)
Supplement: Supplementary file 1 [file get_supplementary_file.php]

**Appendix A** Standard operating procedure for statistical process control.


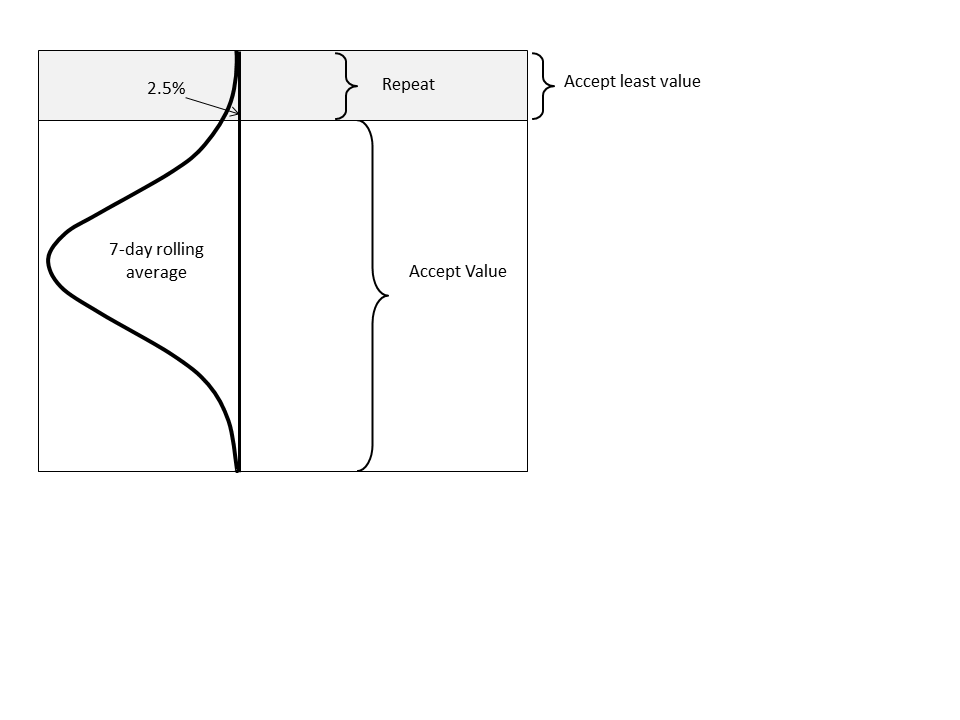
**Panel A** Technical acceptability.


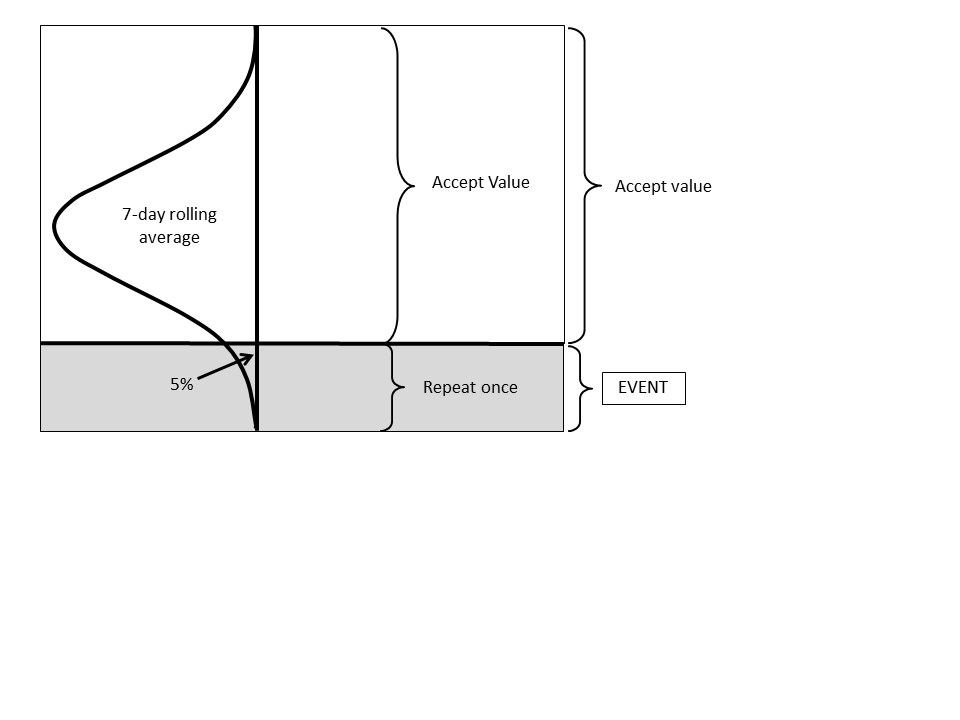
**Panel B.** Clinical event detection.

**Notes:** We employed statistical process control to pick up the deviation of all measures from baseline during monitoring time. There were 4 steps programmed on the portable hand-held spirometry & electronic questionnaires.

**Step 1**: 7-day rolling averages were used as the baseline of daily measurement s. Values recorded on subsequent days were judged acceptable if they lay between pre-defined upper and lower limits assuming normal distribution.

**Step 2 (Panel A)**: The higher cut-off value identified the highest 2.5% of normally distributed values (P=0.975). If the measured value was higher than this, subjects were asked to repeat the maneuver and the lowest of the two measures was accepted.

**Step 3 (Panel B)**: The lower cut-off value identified the lowest 5% of normally distributed values (P=0.050). If the measured value was lower than this, subjects were asked to repeat once. If the repeated value was above the threshold, then that value was accepted. If lower again, a clinical event was marked and sent as an alarm to the research center.

**Step 4**: Alarms on 2 consecutive days were counted as an exacerbation.

## Appendix B Overall adherence scores for old and new software

| **Adherence Score**  **(0-6)** | **Old**  **Software (%)** | **New**  **Software (%)** | **Chi-Squared**  **P-value** |
| --- | --- | --- | --- |
| 0 | 592 (42.4%) | 340 (27.9%) | <0.001 |
| 1 | 31 (2.2%) | 0 (0.0%) |
| 2 | 2 (0.1%) | 0 (0.0%) |
| 3 | 5 (0.4%) | 0 (0.0%) |
| 4 | 20 (1.4%) | 0 (0.0%) |
| 5 | 47 (3.4%) | 33 (2.7%) |
| 6 | 701 (50.1%) | 847 (69.4%) |
| Total Days monitored | 1398 | 1220 |  |

**Notes:** Adherence score was ordinal where 0=0% adherence and 6=100% adherence. Overall, subjects on new software had better overall compliance (higher % of high adherence score) than those on the old software (P<0.0001).
